# Supplementary material
Source: ML conference proceedings conference paper supplement (https://proceedings.neurips.cc/paper_files/paper/2019/hash/e046ede63264b10130007afca077877f-Abstract.html)
Supplement: Supplementary file 1 [file e046ede63264b10130007afca077877f-Supplemental.zip]

## 350 A Samples from Potts Model

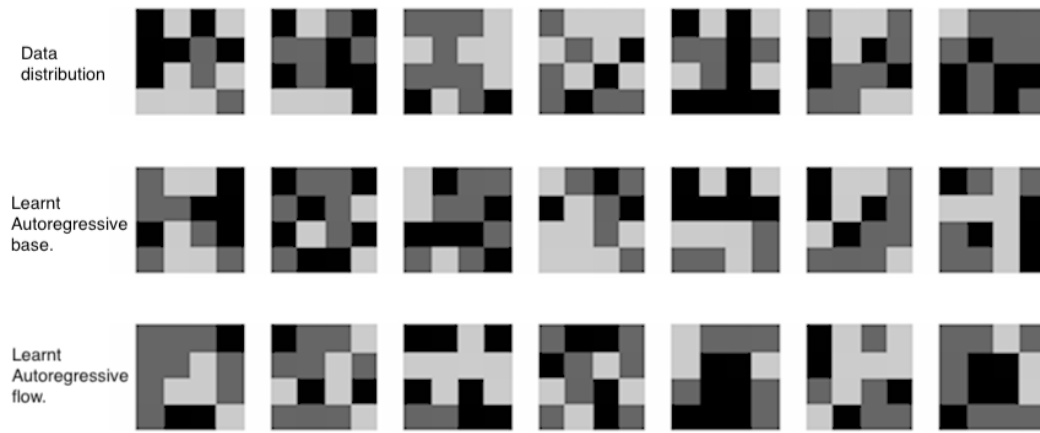

**Figure 4:** Samples from Potts model, for 4x4 grid with 3 states and coupling strength ( $J$ ) = 0.1
