# Supplementary material
Source: ML conference proceedings conference paper supplement (https://proceedings.neurips.cc/paper_files/paper/2019/hash/e046ede63264b10130007afca077877f-Abstract.html)
Supplement: Supplementary file 2 [file e046ede63264b10130007afca077877f-Supplemental.zip]

Archive with 1 entries (1 files):
- supplement.pdf
